# Supplementary material for: Reaction-based energy level modulation of a cyclometalated iridium complex for electrochemiluminescent detection of formaldehyde
Source: RSC Adv. 2023 Nov 1;13(46):32070–6. doi: 10.1039/d3ra06936b (PMC10618939; doi:10.1039/d3ra06936b)
Supplement: RA-013-D3RA06936B-s001 [file RA-013-D3RA06936B-s001.pdf]

Electronic Supplementary Material (ESI) for

**Reaction-based energy level modulation of a cyclometalated iridium complex for  
electrochemiluminescent detection of formaldehyde**

Hyun Seung No and Jong-In Hong\*

*Department of Chemistry, College of Natural Sciences, Seoul National University, Seoul 08826,  
Republic of Korea*

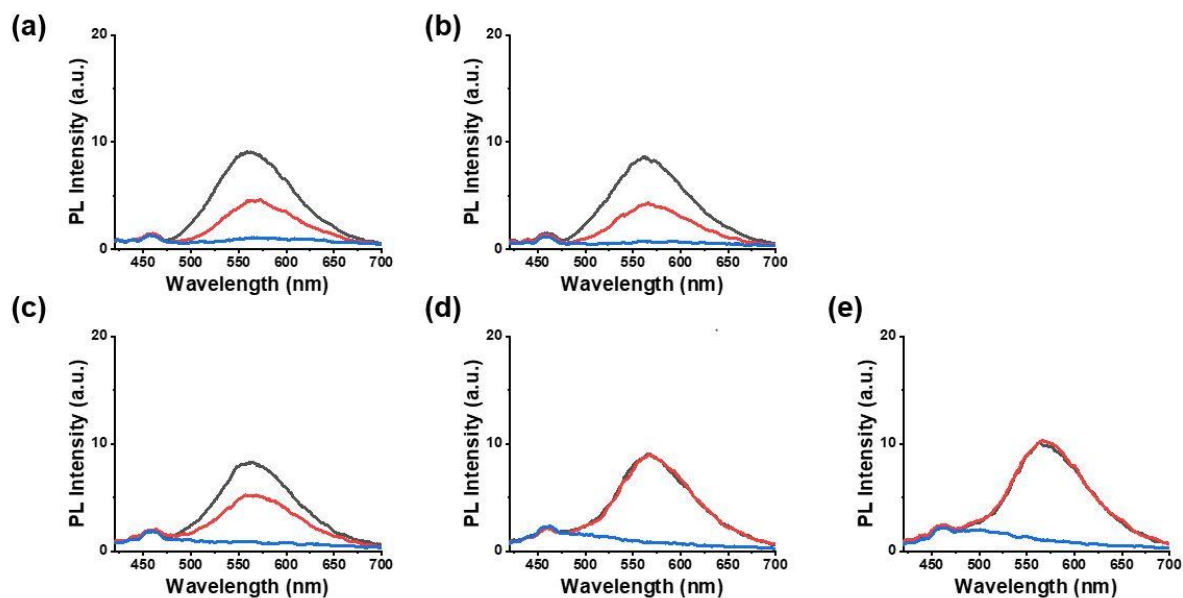

**Figure S1.** pH-dependent phosphorescence spectra of **IrHAA** (Black), **IrHAA** + formaldehyde (FA) 10 mM (Red), **IrCHO** (Blue). Adjusted pH: a) 4.5, b) 5.5, c) 6.5, d) 7.5, e) 8.5.

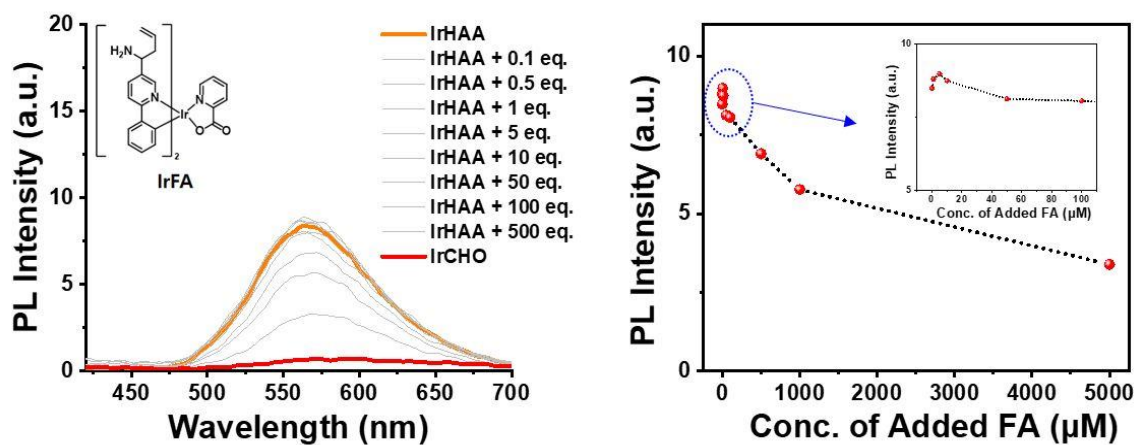

**Figure S2.** (Left) Phosphorescence spectra of **IrHAA** (10  $\mu\text{M}$ ) with the addition of FA in aqueous solution and (Right) corresponding calibration curve.

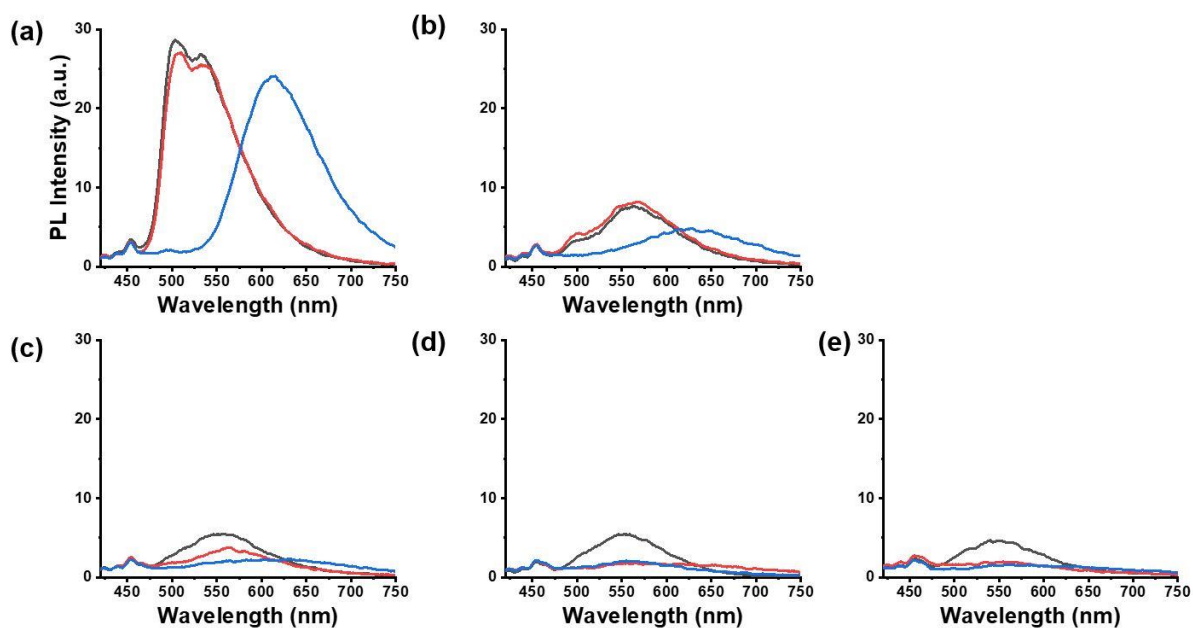

**Figure S3.** Phosphorescence spectra of IrHAA (Black), IrHAA + FA 10 mM (Red), and IrCHO (Blue) in  $\text{CH}_3\text{CN}/\text{H}_2\text{O}$  (v/v) mixture with different ratios (v/v = (a) 10:0, (b) 9:1, (c) 8:2, (d) 7:3, (e) 6:4).

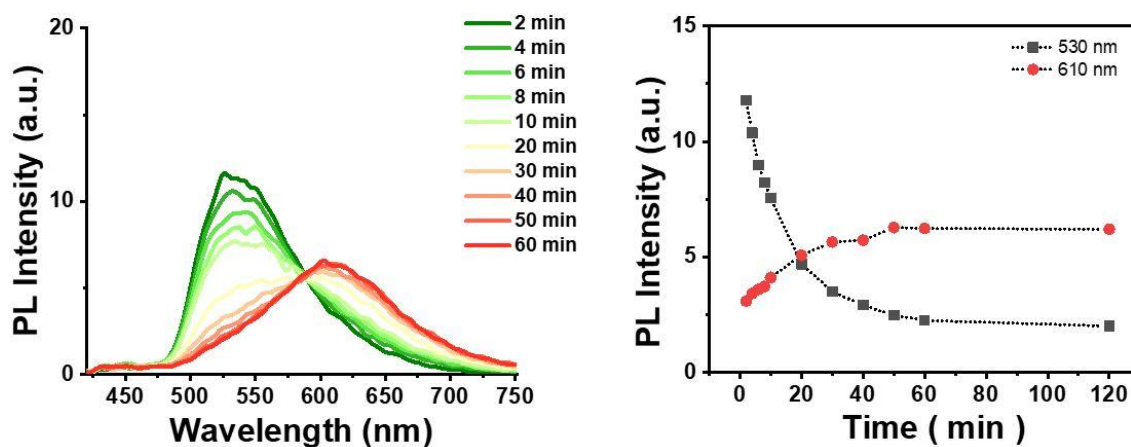

**Figure S4.** (a) Time-dependent phosphorescence spectral changes of IrHAA with the addition of FA (10 mM) in  $\text{CH}_3\text{CN}$  with 0.1% TFA. (b) Time-dependent phosphorescence intensity changes of IrHAA at 530 nm and 610 nm.

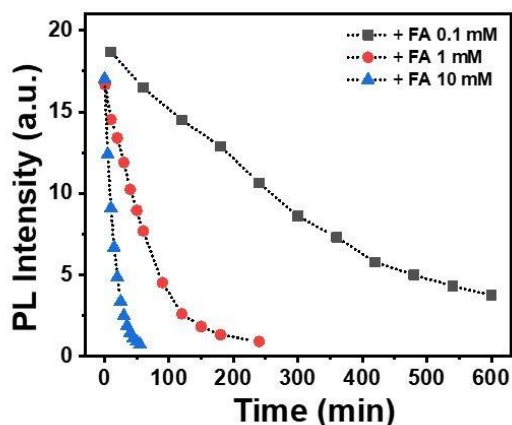

**Figure S5.** Changes in the time-dependent phosphorescence intensity of **IrHAA** with the addition of various concentrations of FA (0.1, 1, 10 mM) in  $\text{CH}_3\text{CN}$  solution with 0.1% TFA.

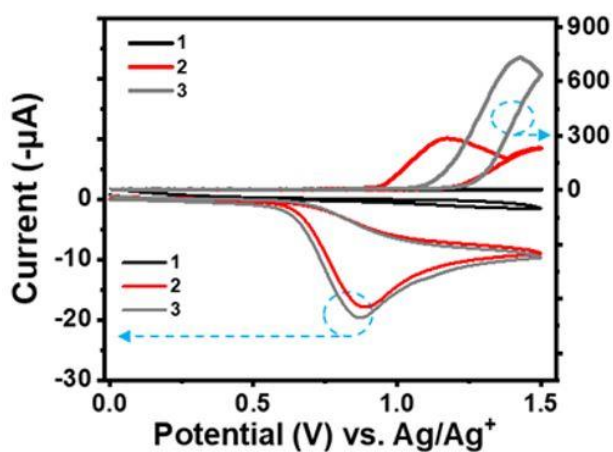

**Figure S6.** Cyclic voltammograms (bottom) and corresponding ECL intensities (top) measured during potential sweep (0 ~ 1.5 V) in  $\text{CH}_3\text{CN}$  (0.1% TFA) in the presence of 0.1 M TBAP after the addition of (1) **IrHAA** (10  $\mu\text{M}$ ) + FA (10 mM), (2) **IrHAA** (10  $\mu\text{M}$ ) + TPrA (20 mM), (3) **IrHAA** (10  $\mu\text{M}$ ) + FA (10 mM) + TPrA (20 mM).

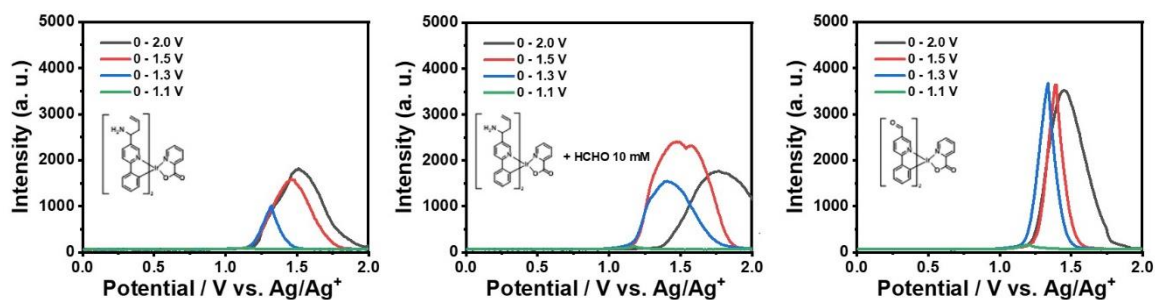

**Figure S7.** ECL intensities of iridium complexes (10  $\mu\text{M}$ ) under different sweep oxidation potential (0 ~ 1.1, 1.3, 1.5 and 2.0 V) with TPrA as the co-reactant (20 mM).

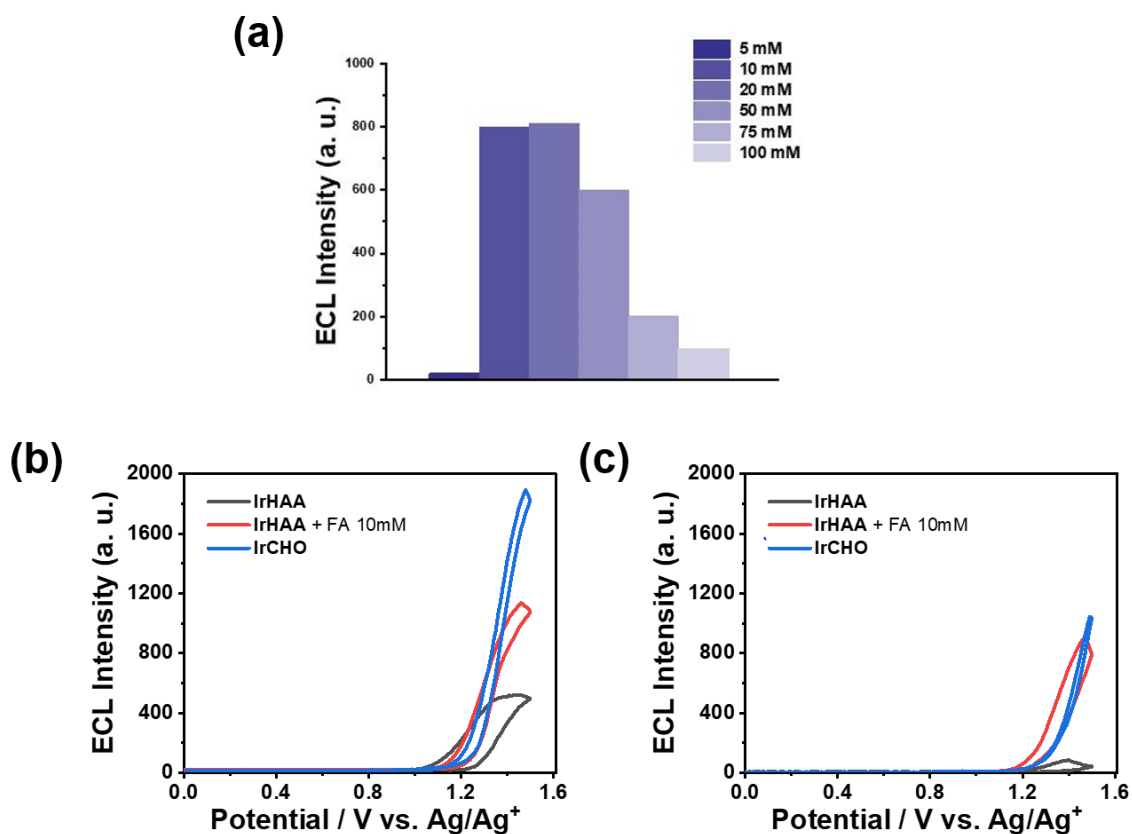

**Figure S8.** (a) Comparison of ECL intensities of IrHAA (25  $\mu\text{M}$ ) + FA (10 mM) under different concentrations (5, 10, 20, 50, 75, 100 mM) of TPrA, (b) Comparison of ECL intensities of iridium complexes (25  $\mu\text{M}$ ) after addition of 20 mM of TPrA, (c) Comparison of ECL intensities of iridium complexes after addition of 50 mM of TPrA.

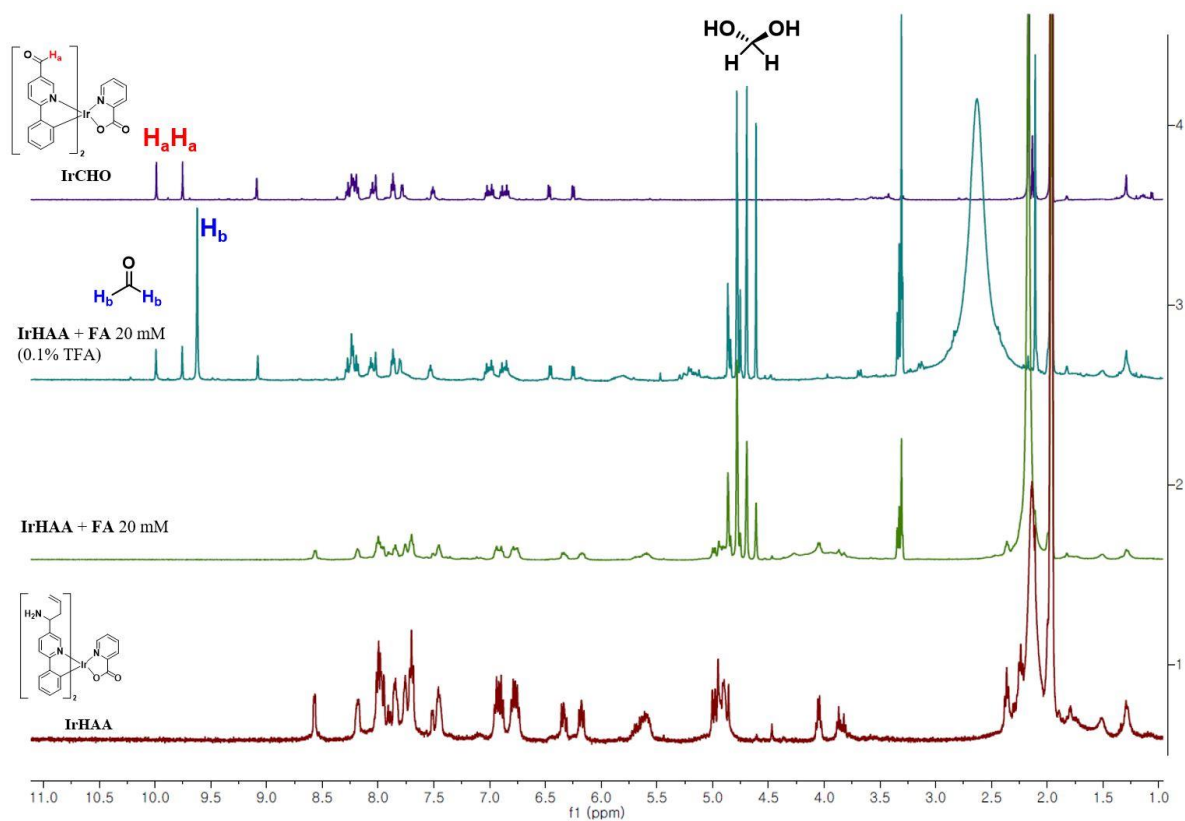

**Figure S9.** Comparison of  $^1\text{H}$  NMR spectra of **IrHAA** (2 mM) before and after the addition of **FA** (20 mM) with **IrCHO** (2 mM) in  $\text{CD}_3\text{CN}$ .



## $^1\text{H}$ and $^{13}\text{C}$ NMR

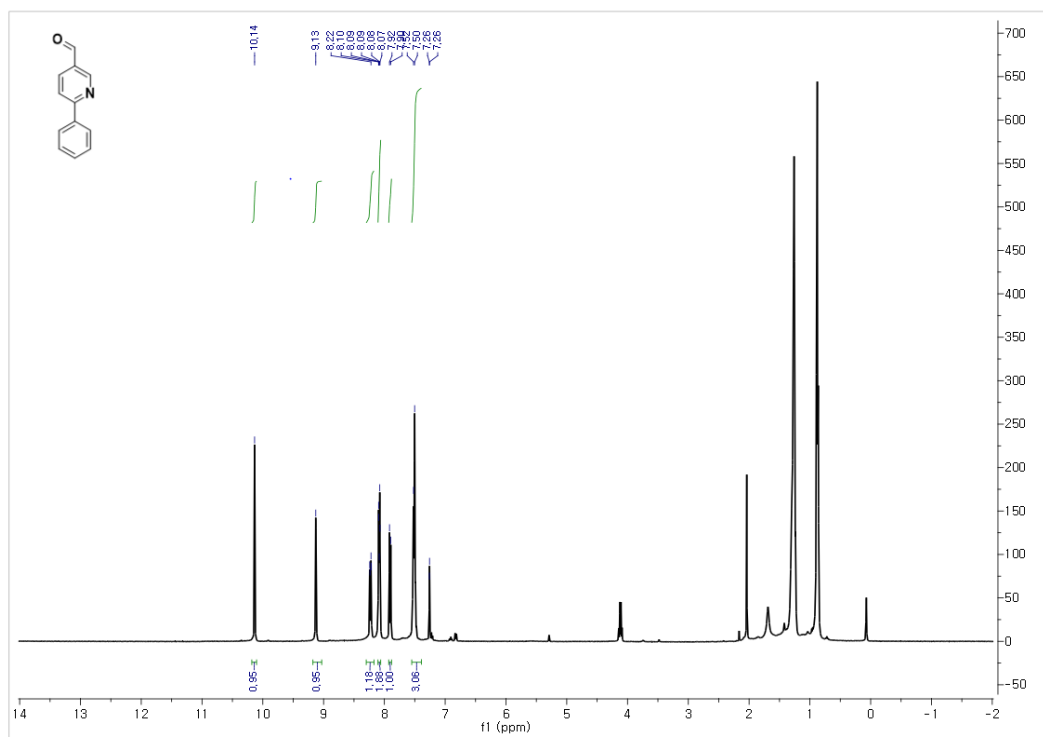

Figure S11.  $^1\text{H}$  NMR of 6-phenyl-3-pyridinecarboxaldehyde (400 MHz,  $\text{CDCl}_3$ ).

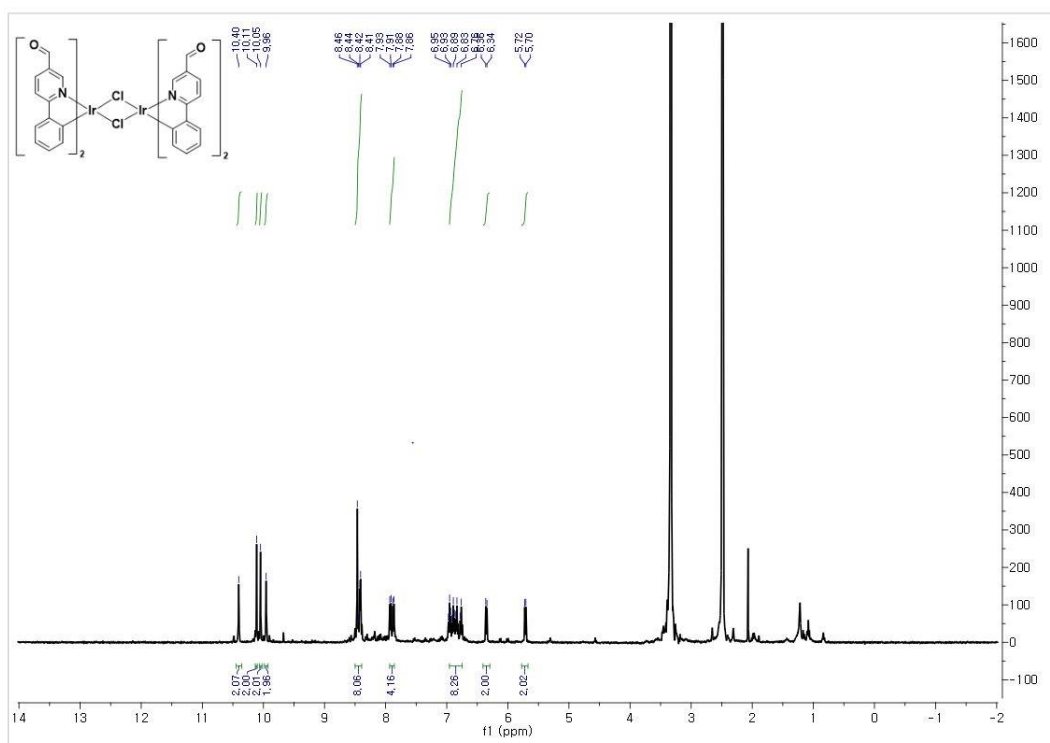

Figure S12.  $^1\text{H}$  NMR of iridium dimer complex (400 MHz,  $\text{DMSO-d}_6$ ).

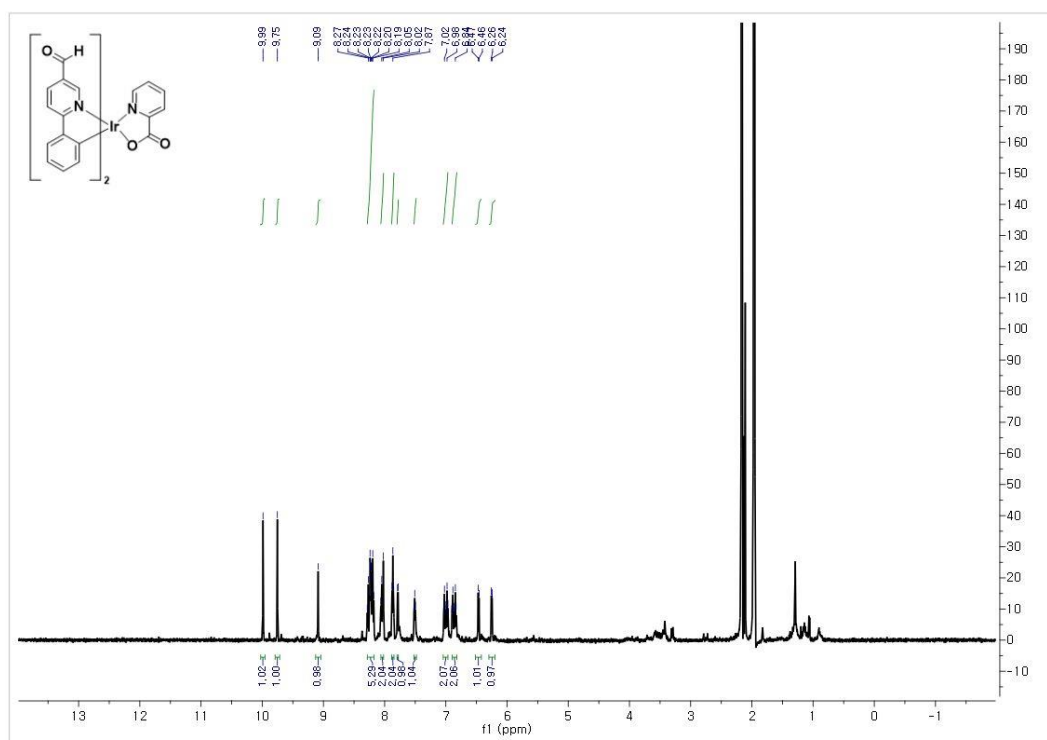

Figure S13. <sup>1</sup>H NMR of IrCHO (500 MHz, CD<sub>3</sub>CN).

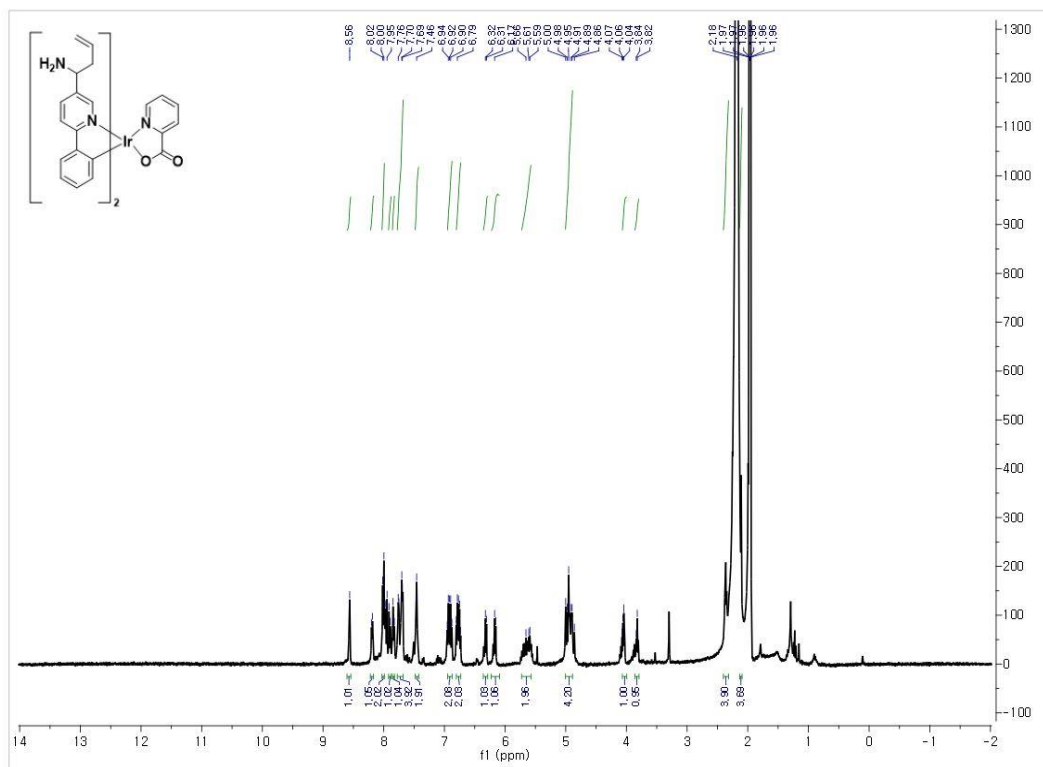

Figure S14. <sup>1</sup>H NMR of IrHAA (400 MHz, CD<sub>3</sub>CN).

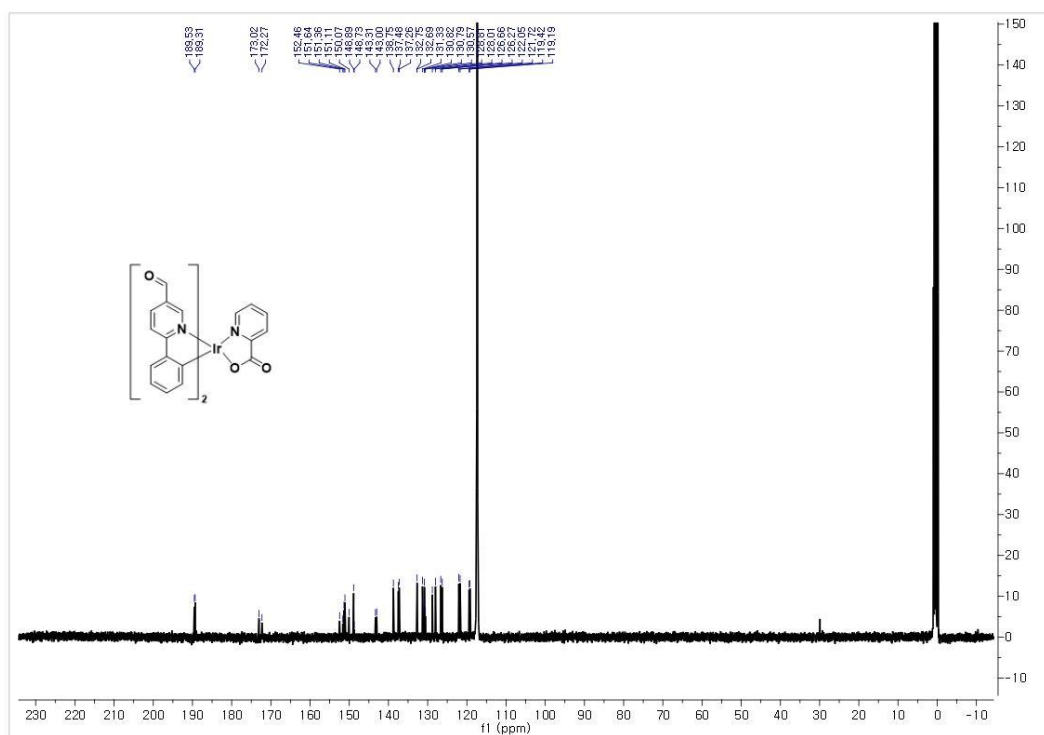

Figure S15. <sup>13</sup>C NMR of IrCHO (101 MHz, CD<sub>3</sub>CN).

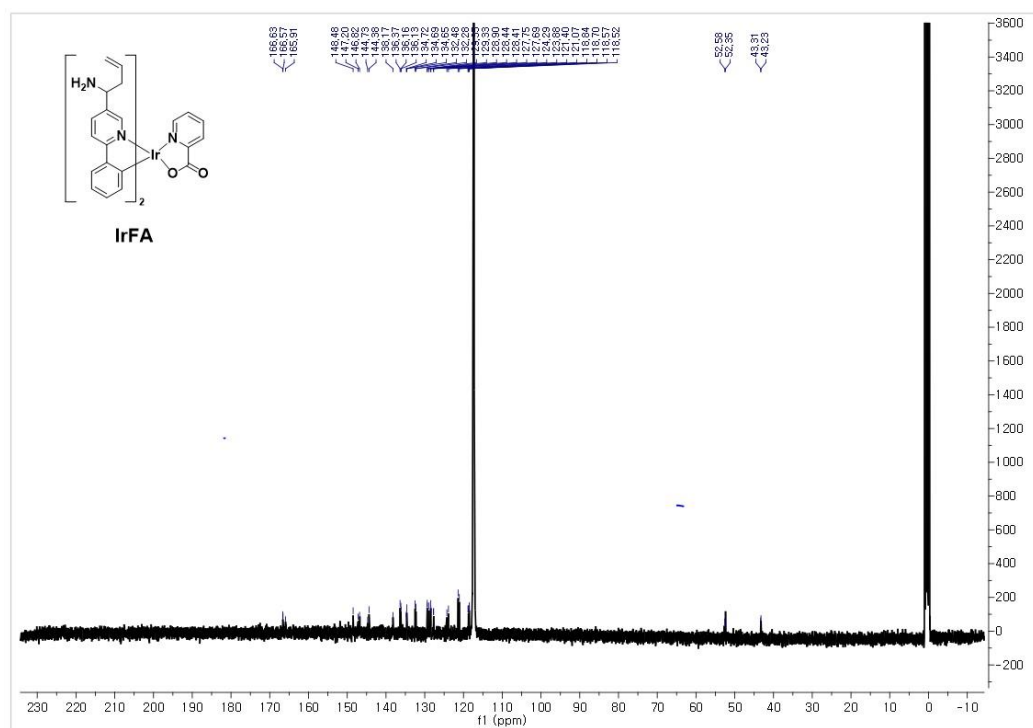

Figure S16. <sup>13</sup>C NMR of IrHAA (101 MHz, CD<sub>3</sub>CN).

## High Resolution Mass Spectra (HRMS)

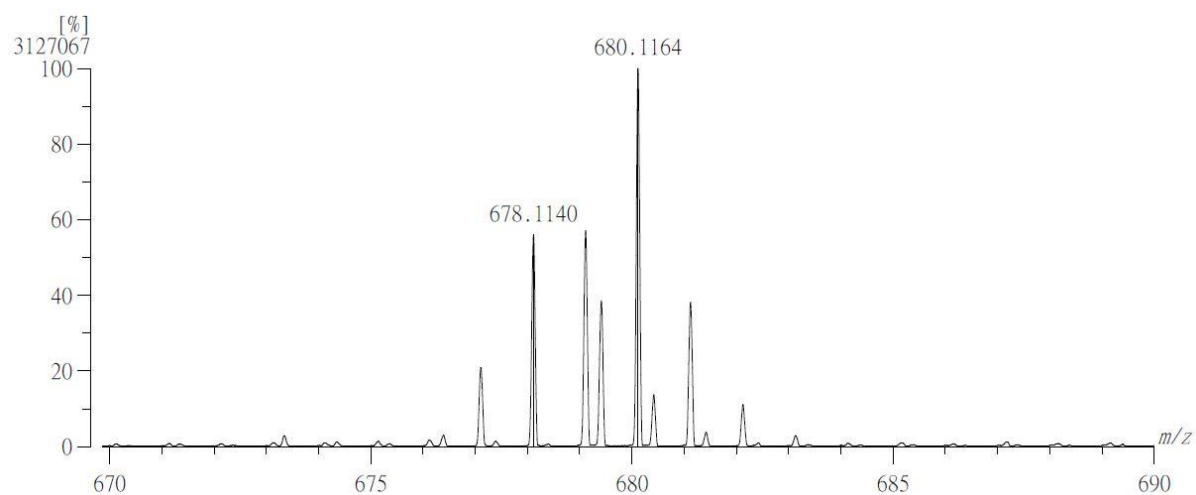

**Figure S17.** HRMS of IrCHO.

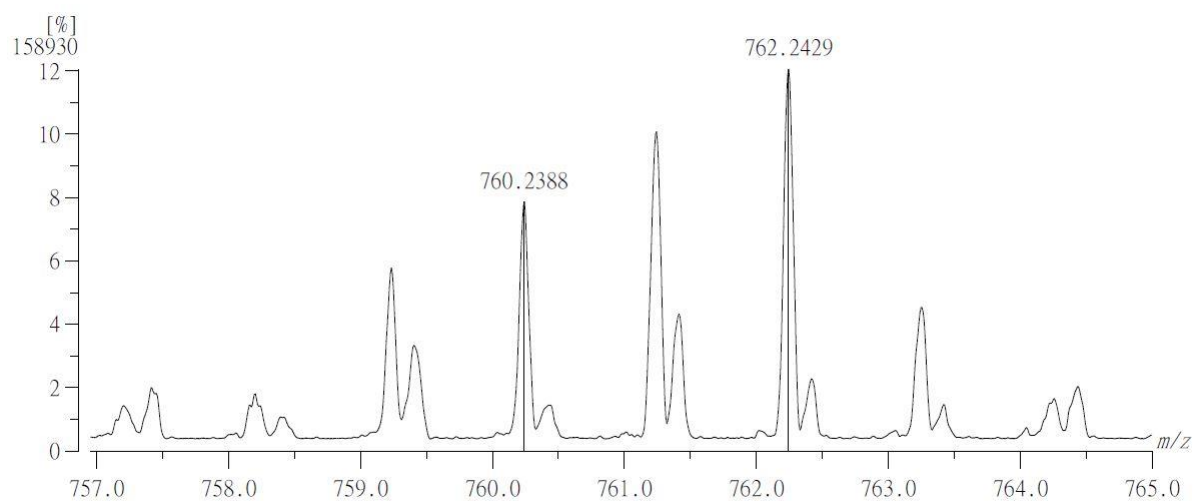

**Figure S18.** HRMS of IrHAA.
